# Supplementary material
Source: publisher figshare collection journal article supplement (https://geolsoc.figshare.com/ndownloader/files/23758738)
Supplement: Supplementary file 1 [file 23758738]

## SEISMIC DATABASE FOR THE BABBAGE AREA

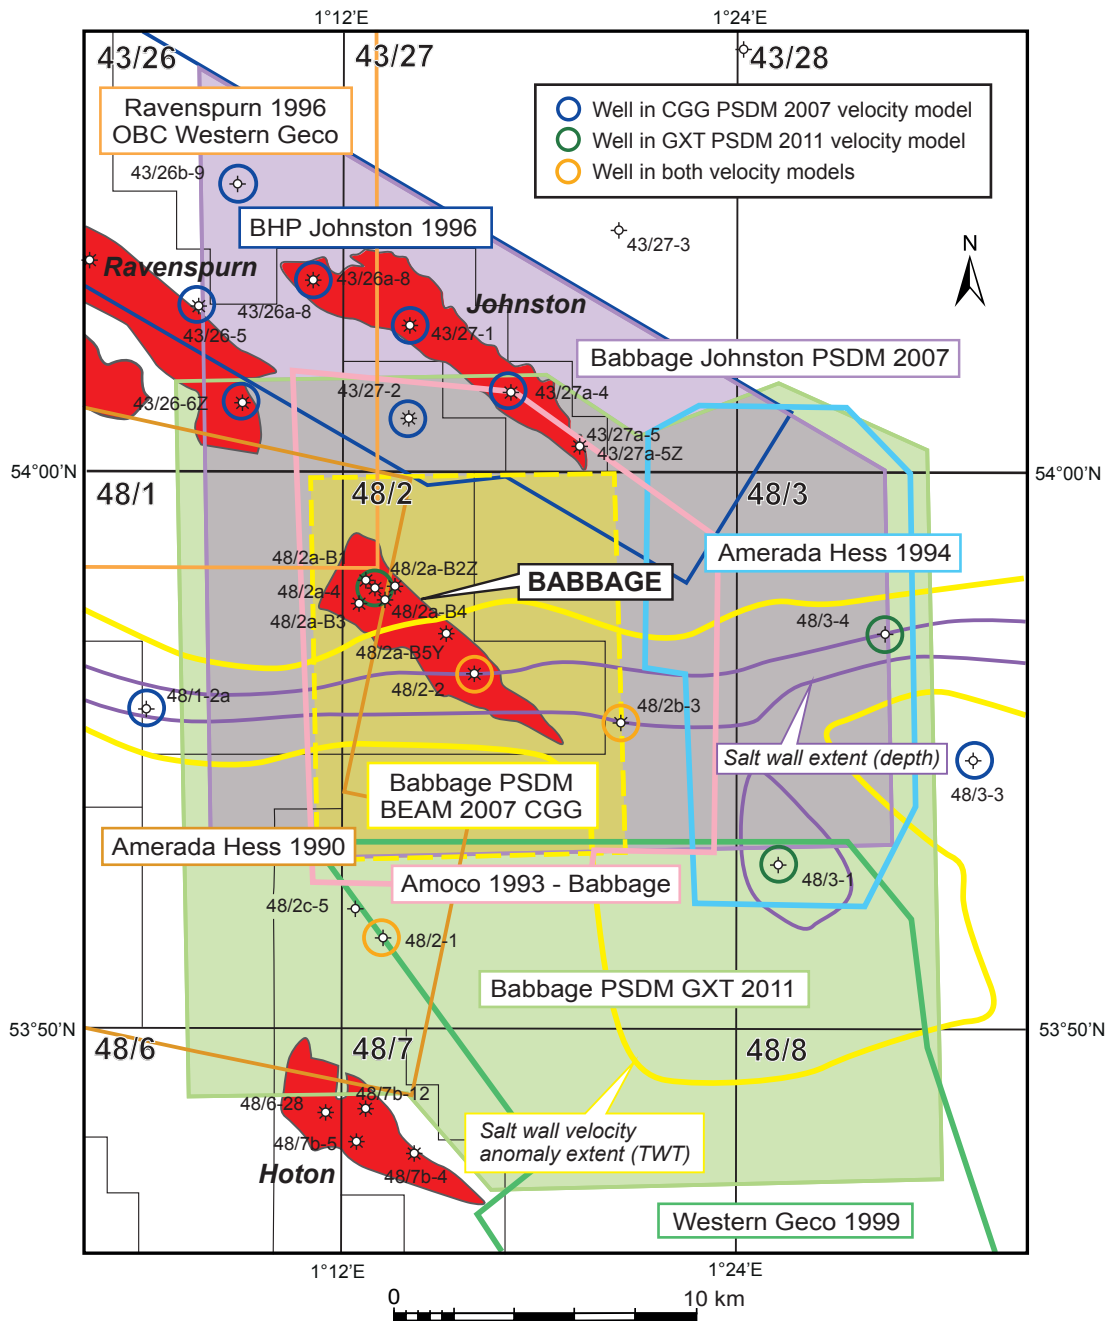

Seismic database for the Babbage area, showing the wells used in the velocity models, the extent of the salt wall in depth, and the extent of the velocity anomaly in two way time. Five wells have penetrated the salt wall, providing calibration points for the velocity models.

The first PSDM reprocessing (CGG 2007) also covered the Johnston Field to the north and included 12 wells in the velocity model. This PSDM had Kirchhoff migration and a beam migration applied over a smaller area (extents shown this figure; data examples shown in Figure 5).

The second PSDM reprocessing (GXT 2011) included 6 wells in the velocity model (extents this figure). This PSDM included a Reverse Time Migration (RTM) in addition to the Kirchhoff and beam migrations, to help address the two-way time (TWT) anomalies produced by the salt wall.
